# Supplementary material for: c-di-GMP Regulates Various Phenotypes and Insecticidal Activity of Gram-Positive Bacillus thuringiensis
Source: PubMed Central journal article supplement (PMC5816809; doi:10.3389/fmicb.2018.00045), 2018-02-13
Supplement: Image3.pdf [file Image3.pdf]

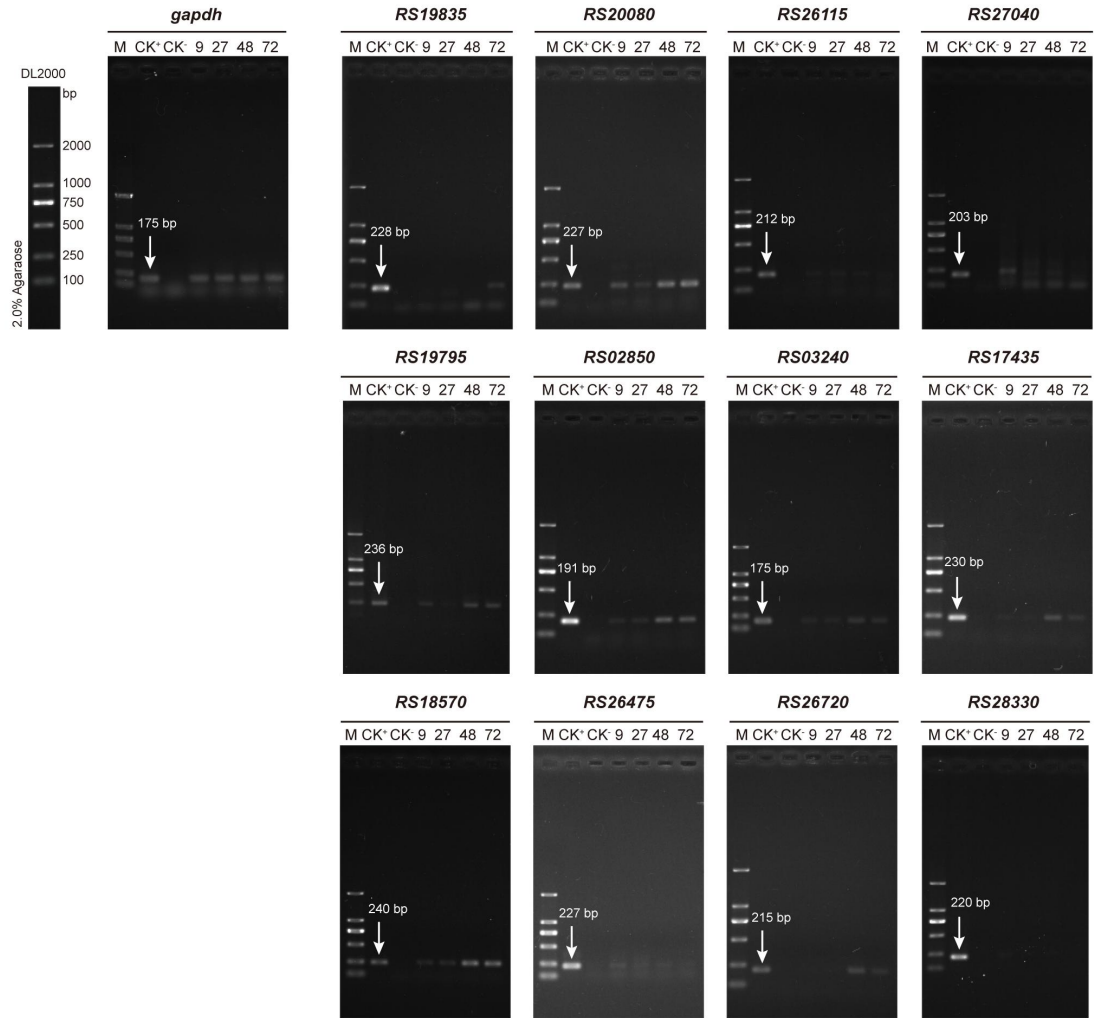

**Figure S3. Transcript levels of the twelve genes coding putative proteins at four different sampling time points (9 h, 27 h, 48 h and 72 h) in LB medium .**
