# Supplementary material for: c-di-GMP Regulates Various Phenotypes and Insecticidal Activity of Gram-Positive Bacillus thuringiensis
Source: PubMed Central journal article supplement (PMC5816809; doi:10.3389/fmicb.2018.00045), 2018-02-13
Supplement: Image4.pdf [file Image4.pdf]

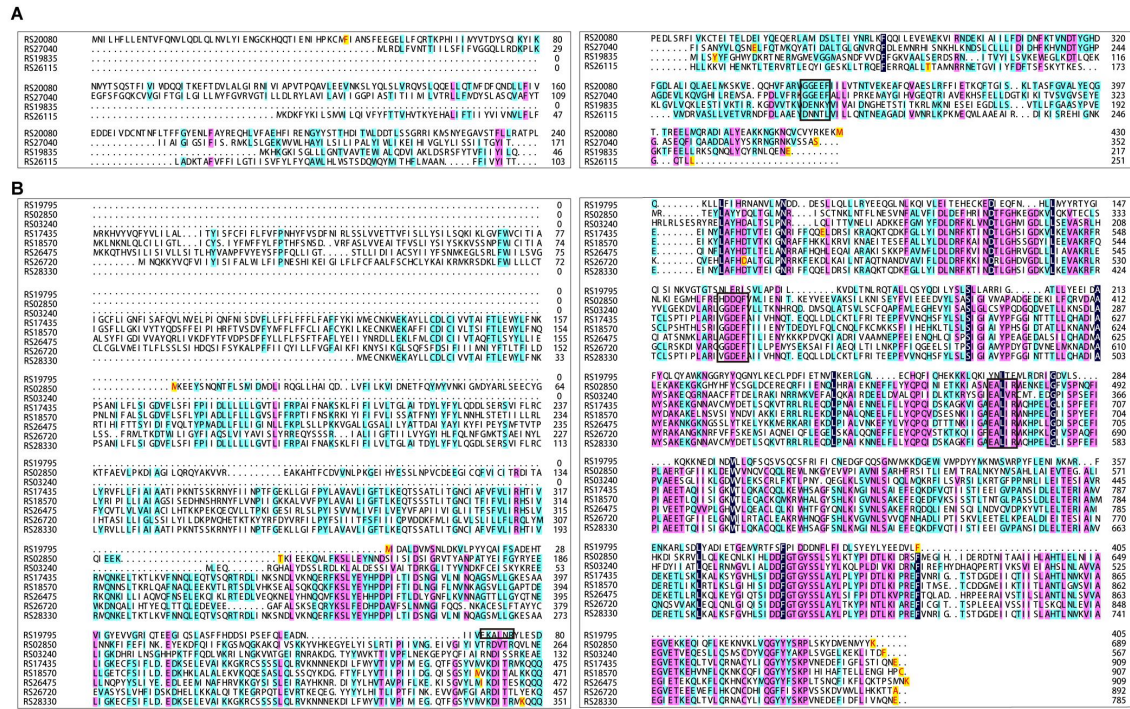

**Figure S4. Amino acid sequence alignment of twelve putative proteins and residue boundaries for the domain constructs used for protein expression. (A)** Amino acid sequence alignments and residue boundaries used for protein expression for four putative proteins with GGDEF domain. **(B)** Amino acid sequence alignments and residue boundaries used for protein expression for eight putative proteins with an EAL or a dual GGDEF-EAL domain. Black colour shading highlights 100% homology level. Pink colour shading highlights 75% homology level. Blue colour highlights 50% homology level. Red letter and yellow colour shading highlights residue boundaries used for protein expression. Black box highlights probable GGDEF motif and EAL motif.
