# Supplementary material for: c-di-GMP Regulates Various Phenotypes and Insecticidal Activity of Gram-Positive Bacillus thuringiensis
Source: PubMed Central journal article supplement (PMC5816809; doi:10.3389/fmicb.2018.00045), 2018-02-13
Supplement: Image5.pdf [file Image5.pdf]

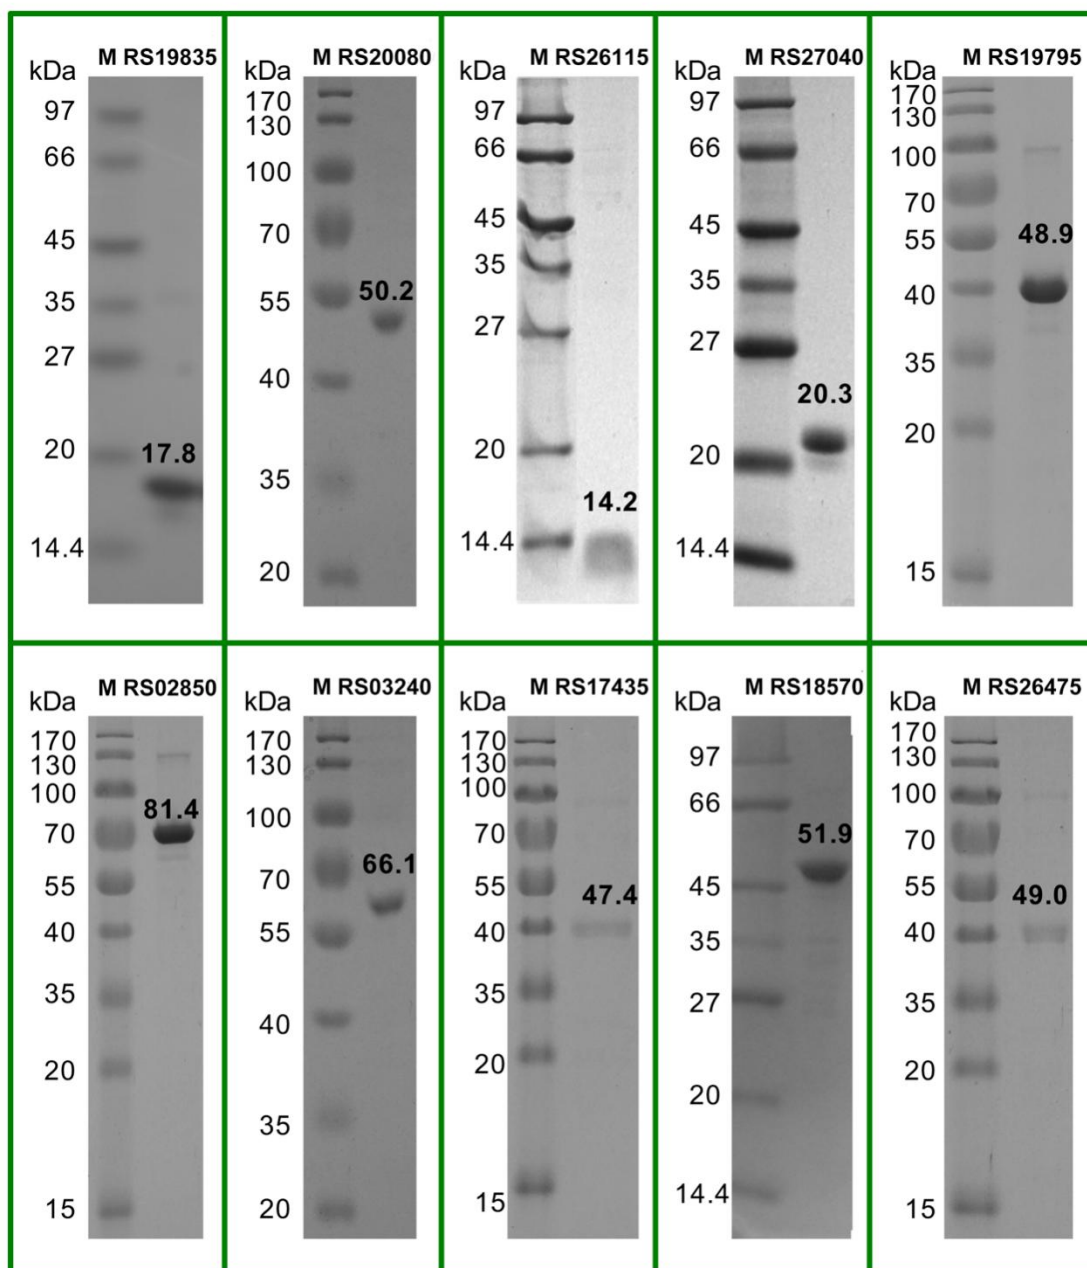

**Figure S5. SDS-PAGE analyses of the expression levels of ten His<sub>6</sub>-tagged proteins.** Lane M: protein molecular weight marker; Lanes 1-10: SDS-PAGE of purified ten proteins containing a GGDEF domain and/or an EAL domain with a C-terminal His<sub>6</sub>-tag.
