# Supplementary material for: c-di-GMP Regulates Various Phenotypes and Insecticidal Activity of Gram-Positive Bacillus thuringiensis
Source: PubMed Central journal article supplement (PMC5816809; doi:10.3389/fmicb.2018.00045), 2018-02-13
Supplement: Image6.pdf [file Image6.pdf]

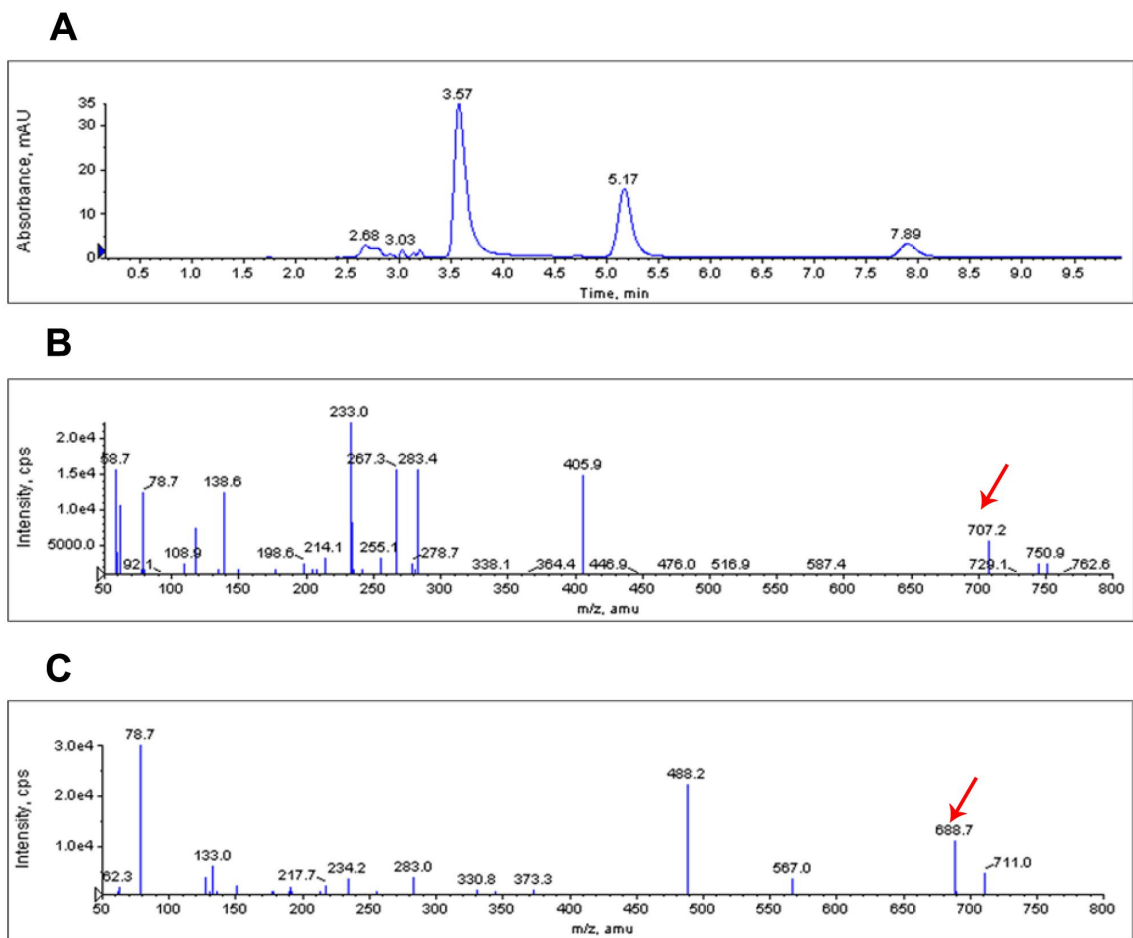

**Figure S6. Detection of pGpG and c-di-GMP from reaction mixture of RS03240 by LC-MS analysis. (A)** HPLC chromatogram of the reaction production of RS03240. **(B)** The mass spectra of the reaction production of RS03240 at 3.57 min. The red arrow indicated the molecular ion peak corresponding to pGpG at 3.57 min with a  $m/z$  of 707.2  $[M-H]^-$ . **(C)** The mass spectra of the reaction production of RS03240 at 5.17 min. The red arrow indicated the molecular ion peak corresponding to c-di-GMP at 5.17 min with a  $m/z$  of 688.7  $[M-H]^-$ .
