# Supplementary material for: c-di-GMP Regulates Various Phenotypes and Insecticidal Activity of Gram-Positive Bacillus thuringiensis
Source: PubMed Central journal article supplement (PMC5816809; doi:10.3389/fmicb.2018.00045), 2018-02-13
Supplement: Image9.pdf [file Image9.pdf]

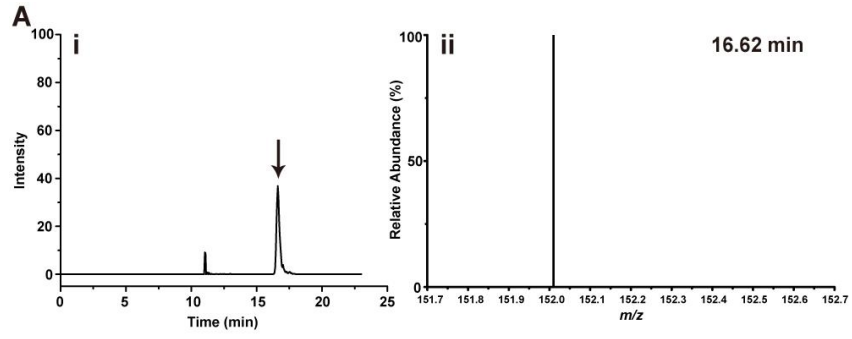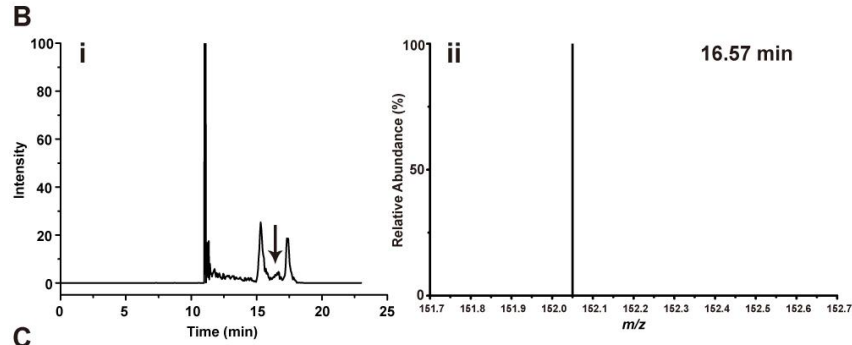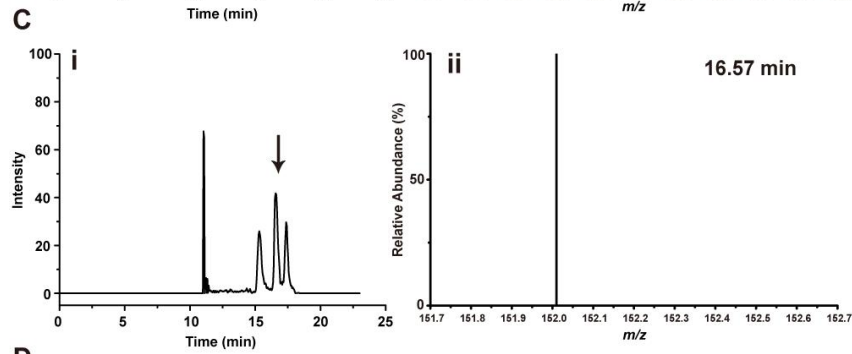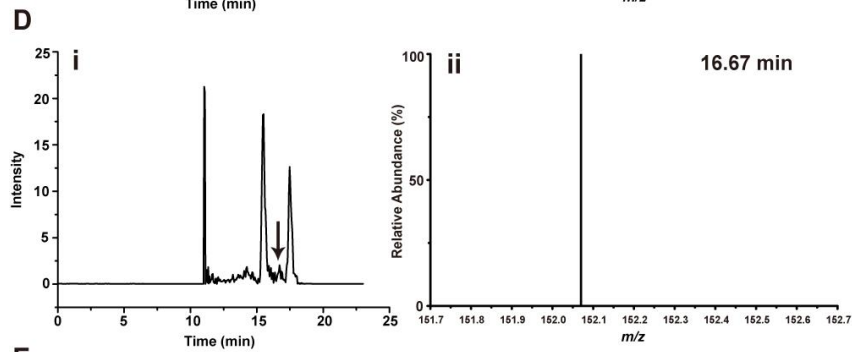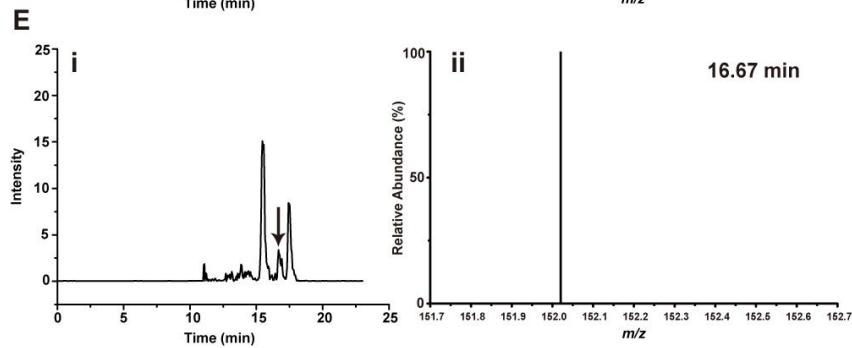

**Figure S9. Detection of intracellular c-di-GMP concentration of BMB171 and  $\Delta 3pde$  by LC-MS/MS at different growth phases. (A to E)** Quantification of intracellular c-di-GMP concentration by LC-MS/MS for the c-di-GMP standard, BMB171 at 9 h,  $\Delta 3pde$  at 9 h, BMB171 at 48 h, and  $\Delta 3pde$  at 48 h, respectively. (i) Signal from the select reaction monitor (SRM) *via* LC-MS/MS. (ii) The tandem mass spectra results of the ion fragment of c-di-GMP at  $m/z=691.135/152.000$  detected by ESI-MS/MS. The peak of c-di-GMP is marked by the black arrow. And then the peak area of c-di-GMP was calculated using Thermo Xcalibur Qual Browser software and used for counting the concentration of c-di-GMP.
