# Supplementary material for: c-di-GMP Regulates Various Phenotypes and Insecticidal Activity of Gram-Positive Bacillus thuringiensis
Source: PubMed Central journal article supplement (PMC5816809; doi:10.3389/fmicb.2018.00045), 2018-02-13
Supplement: Image10.pdf [file Image10.pdf]

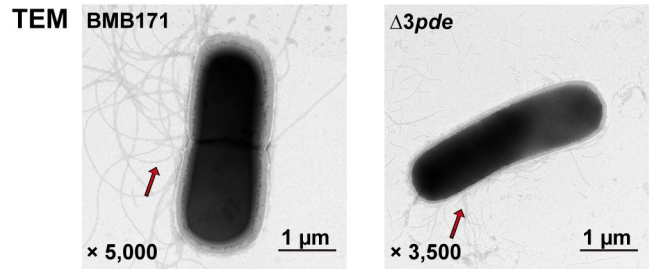

**Figure S10. Transmission electron microscope imaging of BMB171 and  $\Delta 3pde$  flagella.** The bacterial flagella are indicated by red arrows. The strains were streaked on slant semi-solid LB medium containing 0.5% agar and grown at 28°C for 10 h. The cell were resuspended in 1 mL of ddH<sub>2</sub>O, and incubated at 37°C for 10 min. A drop of the suspension was pipetted onto a holy carbon-coated copper grid and dried at room temperature. The enlarged TEM micrographs were taken by a FEI Tecnai G20 transmission electron microscope (Hitachi, Tokyo, Japan).
