# Supplementary material for: c-di-GMP Regulates Various Phenotypes and Insecticidal Activity of Gram-Positive Bacillus thuringiensis
Source: PubMed Central journal article supplement (PMC5816809; doi:10.3389/fmicb.2018.00045), 2018-02-13
Supplement: Image11.pdf [file Image11.pdf]

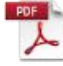

Figure S6.pdf

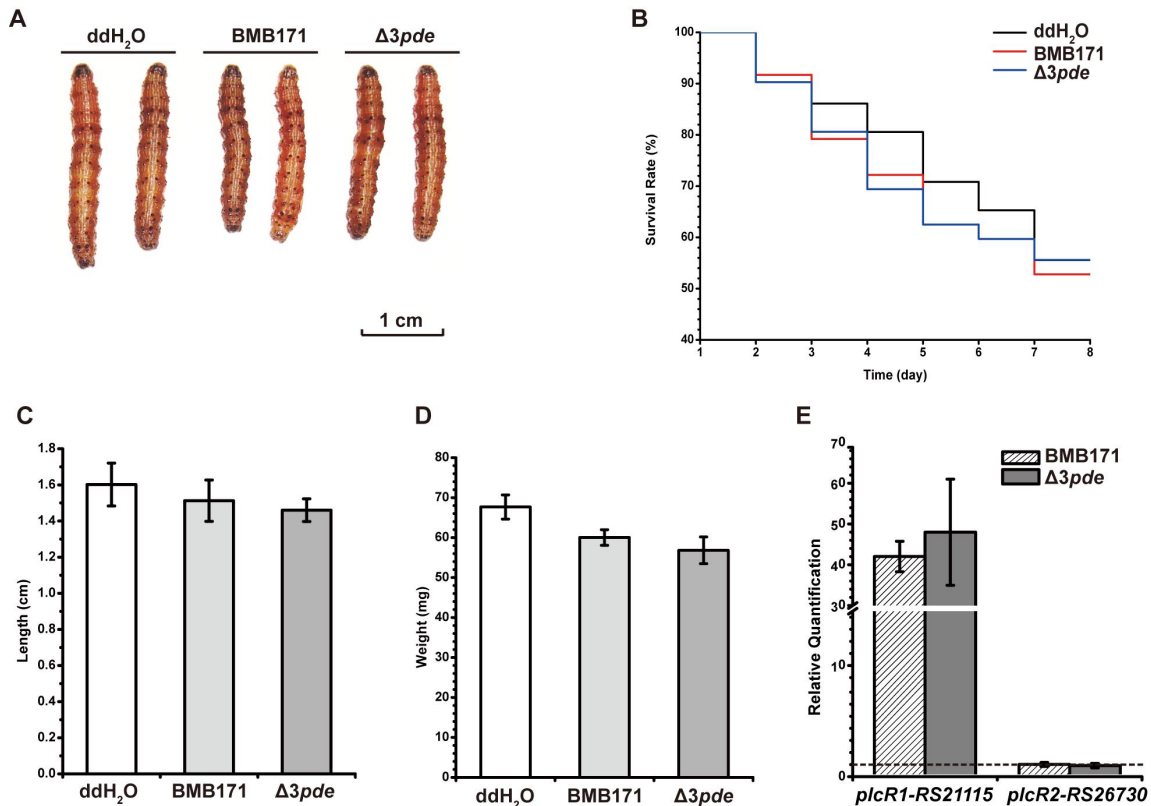

**Figure S11. Virulence of BMB171 and  $\Delta 3pde$  grown at the exponential phase (9 h) are not affected by increasing c-di-GMP level. (A)** The image of cotton bollworm larvae fed with different strains at the end of a rearing cycle. Scale bars represent one centimeter. **(B)** Comparison in survival rates of cotton bollworm larvae fed with BMB171 and  $\Delta 3pde$  within rearing cycle (7 days). The survival rate of cotton bollworm larvae fed with  $\Delta 3pde$  was almost equal to that fed with BMB171 every day. **(C)** Quantitative measurements of body length of cotton bollworm larvae fed with different *B. thuringiensis* strains. The length of cotton bollworm larvae fed with the  $\Delta 3pde$  did not show much difference to those fed with the BMB171. **(D)** Quantitative measurements of body weight of cotton bollworm larvae fed with these different strains. The weight of cotton bollworm larvae fed with the  $\Delta 3pde$  did not show a clear change to that fed with the BMB171 too. **(E)** Comparison of relative transcript levels of *plcR1* and *plcR2* genes between BMB171 and  $\Delta 3pde$  using RT-qPCR method at the mid exponential phase. Error bars represent the standard deviation of three replicates. Dash line represents similar relative quantification. *plcR1* (RS21115) and *plcR2* (RS26730) did not show conspicuous change in  $\Delta 3pde$  compared with that in BMB171.
